# Supplementary material for: Interfacial-related color tuning of colloidal Si nanocrystals
Source: Royal Society of Chemistry journal article supplement (doi:10.1039/c0gc00502a), 2010-01-01
Supplement: c0gc00502a.pdf [file c0gc00502a.pdf]

Electronic Supplementary Information for:

## Interfacial-related Color Tuning of Colloidal Si Nanocrystals

Naoto Shirahata,<sup>\*a,b</sup> Daigo Hirakawa,<sup>a,c</sup> and Yoshio Sakka<sup>a,c</sup>

<sup>a</sup> National Institute for Materials Science (NIMS), 1-2-1 Sengen, Tsukuba, Ibaraki 305-0047, Japan.

E-mail: SHIRAHATA.naoto@nims.go.jp

<sup>b</sup> PRESTO, Japan Science and Technology Agency (JST), 4-1-8 Honcho Kawaguchi, Saitama 332-0012, Japan

<sup>c</sup> Graduate School of Pure and Applied Sciences, The University of Tsukuba, 1-2-1 Sengen, Tsukuba, Ibaraki, Japan

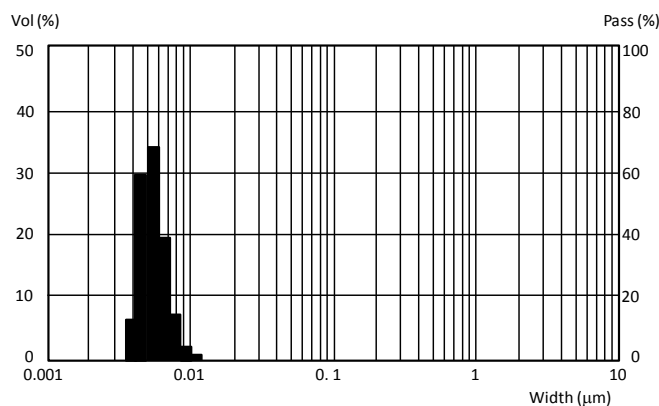

Figure S1. Dynamic light scattering (DLS) profile of alkyl-terminated Si NPs ( $R_f = 0.1$ ) column-separated by silica-gel column chromatography technique with gradient elution of dichloromethane-ethyl acetate.
